# Supplementary material for: The Potential Role of Drove Roads as Connecting Corridors for Birds between Natura 2000 Sites
Source: MDPI journal article supplement (doi:10.3390/birds2030023), 2021-09-15
Supplement: s1 [file s1]

## Supplementary Material

**Table S1.** Abundance (mean $\pm$ sd) of bird species recorded during drove road sampling. Left column shows data of birds detected within the transect (first detected on ground or perching) and right column those that crossed over the transect during sampling.

| Species                      | Within transect   | Flying over      |
|------------------------------|-------------------|------------------|
| <i>Aegypius monachus</i>     |                   | 0.16 $\pm$ 0.50  |
| <i>Alauda arvensis</i>       |                   | 0.05 $\pm$ 0.23  |
| <i>Galerida cristata</i>     | 2.32 $\pm$ 2.03   |                  |
| <i>Alectoris rufa</i>        | 0.21 $\pm$ 0.54   |                  |
| <i>Apus apus</i>             |                   | 4.42 $\pm$ 10.98 |
| <i>Bubulcus ibis</i>         | 0.16 $\pm$ 0.50   | 0.89 $\pm$ 2.23  |
| <i>Buteo buteo</i>           |                   | 0.05 $\pm$ 0.23  |
| <i>Carduelis cannabina</i>   | 0.58 $\pm$ 1.68   |                  |
| <i>Carduelis carduelis</i>   | 0.74 $\pm$ 1.15   |                  |
| <i>Cettia cetti</i>          | 0.05 $\pm$ 0.23   |                  |
| <i>Chloris chloris</i>       | 0.05 $\pm$ 0.23   |                  |
| <i>Ciconia ciconia</i>       |                   | 0.05 $\pm$ 0.23  |
| <i>Clamator glandarius</i>   | 0.05 $\pm$ 0.23   | 0.11 $\pm$ 0.32  |
| <i>Columba livia</i>         |                   | 0.37 $\pm$ 0.96  |
| <i>Columba palumbus</i>      | 1.11 $\pm$ 1.70   | 2.58 $\pm$ 3.69  |
| <i>Corvus corax</i>          |                   | 0.05 $\pm$ 0.23  |
| <i>Corvus corone</i>         | 0.11 $\pm$ 0.32   | 0.16 $\pm$ 0.37  |
| <i>Corvus monedula</i>       |                   | 0.05 $\pm$ 0.23  |
| <i>Cyanistes caeruleus</i>   | 1.26 $\pm$ 2.88   |                  |
| <i>Cyanopica cyanus</i>      | 0.21 $\pm$ 0.71   |                  |
| <i>Delichon urbicum</i>      |                   | 0.16 $\pm$ 0.50  |
| <i>Falco tinnunculus</i>     |                   | 0.05 $\pm$ 0.23  |
| <i>Ficedula hypoleuca</i>    | 0.05 $\pm$ 0.23   |                  |
| <i>Fringilla coelebs</i>     | 0.21 $\pm$ 0.42   |                  |
| <i>Gyps fulvus</i>           |                   | 0.05 $\pm$ 0.23  |
| <i>Hieraaetus pennatus</i>   |                   | 0.11 $\pm$ 0.32  |
| <i>Hirundo rustica</i>       |                   | 0.89 $\pm$ 1.15  |
| <i>Hyppolais polyglotta</i>  | 0.05 $\pm$ 0.23   |                  |
| <i>Lanius senator</i>        | 0.26 $\pm$ 0.93   |                  |
| <i>Lullula arborea</i>       | 0.47 $\pm$ 1.22   |                  |
| <i>Luscinia megarhynchos</i> | 0.21 $\pm$ 0.54   |                  |
| <i>Merops apiaster</i>       | 0.05 $\pm$ 0.23   | 0.16 $\pm$ 0.50  |
| <i>Miliaria calandra</i>     | 0.63 $\pm$ 1.34   |                  |
| <i>Milvus migrans</i>        |                   | 0.32 $\pm$ 0.48  |
| <i>Milvus milvus</i>         |                   | 0.26 $\pm$ 0.56  |
| <i>Motacilla alba</i>        | 0.05 $\pm$ 0.23   |                  |
| <i>Myiopsitta monachus</i>   | 0.16 $\pm$ 0.69   |                  |
| <i>Parus major</i>           | 0.16 $\pm$ 0.50   |                  |
| <i>Passer domesticus</i>     | 8.74 $\pm$ 5.14   |                  |
| <i>Periparus ater</i>        | 0.16 $\pm$ 0.69   |                  |
| <i>Pica pica</i>             | 2.42 $\pm$ 2.43   |                  |
| <i>Picus viridis</i>         | 0.11 $\pm$ 0.46   |                  |
| <i>Saxicola rubicola</i>     | 0.53 $\pm$ 1.07   |                  |
| <i>Serinus serinus</i>       | 1.53 $\pm$ 2.06   |                  |
| <i>Streptotelia decaocto</i> | 0.05 $\pm$ 0.23   | 0.05 $\pm$ 0.23  |
| <i>Sturnus unicolor</i>      | 11.05 $\pm$ 30.14 |                  |

| Species                     | Within transect | Flying over |
|-----------------------------|-----------------|-------------|
| <i>Sylvia atricapilla</i>   | 0.26±0.65       |             |
| <i>Sylvia cantillans</i>    | 0.05±0.23       |             |
| <i>Sylvia melanocephala</i> | 0.79±1.40       |             |
| <i>Turdus merula</i>        | 0.37±0.60       |             |
| <i>Upupa epops</i>          | 0.05±0.23       | 0.11±0.32   |
| Species richness            | 8.32±3.35       | 3.84±1.95   |
| Bird abundance              | 35.26±30.92     | 11.11±11.04 |
